1 **Upregulation of photosynthetic capacity and thylakoid membrane protein enhanced**  
2 **tolerance to heat stress in wucai (*Brassica campestris* L.)**

3 Yujie Yuan<sup>a,b,1</sup>, Lingyun Yuan<sup>a,b,1</sup>, Jie Wang<sup>a,b</sup>, Mengru Zhao<sup>a,b</sup>, Yun Dai<sup>a,b</sup>, Shilei Xie<sup>a,b</sup>,  
4 Shidong Zhu<sup>a,b,c</sup>, Jingfeng Hou<sup>a,b,c</sup>, Guohu Chen<sup>a,b</sup>, Chenggang Wang<sup>a,b,c\*</sup>

5 <sup>a</sup>*Vegetable Genetics and Breeding Laboratory, College of Horticulture, Anhui Agricultural*  
6 *University; Hefei 230036, China;*

7 <sup>b</sup>*Provincial Engineering Laboratory for Horticultural Crop Breeding of Anhui, Hefei 230036,*  
8 *China;*

9 <sup>c</sup>*Wanjiang Vegetable Industrial Technology Institute, Maanshan 243000, Anhui, China*

10 **\*Corresponding author: Chenggang Wang**

11 E-mail: cgwang@ahau.edu.cn

12 Tel: +86-138-5601-9198

13

14

15

16

17

18

19

20

21

22

23

24

25

26

27

28

29 **Abstract:**

30 The hot climate of southern China from late summer to early fall is one of the major factors  
31 limiting the yield and quality of wucaï (*Brassica campestris* L.). Under high temperature  
32 stress, heat-tolerant cultivars presented moderate injury to the photosynthetic apparatus, less  
33 inhibition of photochemical activity, better osmotic adjustment and antioxidant defences  
34 capacity compared to heat-sensitive cultivars. To study the effects of high temperature on the  
35 growth and development of wucaï, plants of WS-1 (heat-tolerant) and WS-6 (heat-sensitive)  
36 were exposed to four heat stress treatments in growth chambers for 3 days. Chloroplasts of  
37 two cultivars evaluated for photosynthetic characteristics, fatty acid composition and  
38 differentially expressed proteins of thylakoid membrane. The chlorophyll (Chl) content was  
39 markedly reduced by heat stress, inhibiting photochemical activity. However, larger decreases  
40 in growth and photosynthetic parameters [net photosynthetic rate ( $P_N$ ), stomatal conductance  
41 ( $G_S$ ), intercellular  $CO_2$  concentration ( $C_i$ ), and leaf transpiration rate ( $E$ )] occurred under heat  
42 stress in WS-6, compared with WS-1. In addition, WS-6 showed an obvious K point in O-J-  
43 I-P steps under extremely high temperature, which indicated OEC had been damaged. WS-1  
44 showed higher of maximum quantum yield of primary PSII photochemistry ( $F_v/F_M$ ), number  
45 of active reaction centres per cross section of PSII ( $RC/CS_M$ ), average absorbed photon flux  
46 per cross section of PSII ( $ABS/CS_M$ ), maximum trapped exciton flux per cross section of PSII  
47 ( $TR_0/CS_M$ ), electron transport flux from  $Q_A$  to  $Q_B$  per cross section of PSII ( $ET_0/CS_M$ ) and  
48 performance index on absorption basis ( $PI_{ABS}$ ) which indicated greater heat stability in terms  
49 of PSII function under higher temperature. Compared to WS-6, WS-1 showed higher  
50 membrane stability and photochemical efficiency, and greater increase of saturated fatty  
51 acids (SFA), especially palmitic acid under heat stress. WS-1 had higher recovery rate  
52 compared to WS-6 after 41 °C heat stress treatment. Additionally, two-dimensional blue  
53 native/SDS-PAGE analysis of chloroplast was carried out to compare the differentially  
54 expressed proteins between two cultivars. We obtained seven major protein complexes  
55 included supercomplexes, PSI-LHCII/PSII monomer, PSII monomer, CP43 less PSII/ATP

56 synthase, LHCII trimer, LHCII monomer and ATP synthase after first dimensional separation  
57 in both cultivars after the first dimensional separation. Then ten differential membrane  
58 proteins included light-harvesting Chl *a/b*-binding (LHC) protein , ATP synthase subunit  
59 alpha, ATP synthase subunit beta, photosystem I P700 chlorophyll *a* apoprotein A2,  
60 photosystem II CP43 reaction center protein, photosystem II D2 protein and photosystem II  
61 OS have been found between WS-1 and WS-6. These differentially proteins in cellular  
62 membranes could contribute to the differential level of heat tolerance between two wucaï  
63 cultivars. Our results demonstrated that the heat-tolerant cultivar WS-1 had a greater capacity  
64 for photosynthesis and membrane stability by upregulating proteins abundance including light  
65 harvesting (light-harvesting Chl *a/b*-binding protein), energy metabolism (ATPase), and  
66 proteins of PSII reaction center (D2, CP43) under heat stress.

67 **Key words: Heat stress, Photosynthesis, Chlorophyll *a* fluorescence OJIP transient,**  
68 **Fatty acid, Two-dimensional blue native/SDS-PAGE**

69 **Introduction:**

70 Wucai (*Brassica campestris* L. ssp. *chinensis* var. *rosularis* Tsen et Lee.) is a type of non-  
71 heading Chinese cabbage with high nutritional value. It is a cruciferous, biennial herb,  
72 originated from China and distributed mainly in Yangtze-Huaihe River basin (Yuan and Sun  
73 2001). Wucai grows well in cold weather of late October, but not in the hot summer (Shao et  
74 al. 2014). The high temperature might inhibit the seedling growth of wucan and even cause  
75 heat damage. To achieve annual production and meet market demand, it is critical to select  
76 and breed heat-tolerant wucan cultivars.

77 Photosystem II is generally considered to be the primary target of heat-induced inactivation of  
78 the photosynthetic membranes (Allakhverdiev et al. 2008; Mohanty et al. 2012).  
79 Environmental stress mediated decreases in photosynthesis may result from inhibition of PSII  
80 activity, which also leads to a decrease in variable chlorophyll fluorescence (Baker and  
81 Rosenqvist 2004; Maxwell and Johnson 2000; Feng et al. 2014). Chlorophyll *a* fluorescence  
82 is widely used in photosynthesis research, plant physiology, plant phenotyping, remote  
83 sensing of plants, and other fields of research that are related to photosynthesis (Kalaji et al.  
84 2017, Mishra et al. 2016). Specifically, the analysis of fluorescence signals provides detailed  
85 information on the status and function of Photosystem II (PSII) reaction centers,  
86 light-harvesting antenna complexes, and both the donor and acceptor sides of PSII (Kalaji, H  
87 et al. 2016).

88 The membrane plays important roles in sensing environmental change, signal transduction  
89 and substance metabolism (Mittler et al. 2012; Guyot et al. 2015). Phospholipids forms the  
90 bilayers of the membrane, which mainly consists of fatty acids in saturated or unsaturated  
91 forms, and proper fatty acid composition is critical for maintaining membrane stability during  
92 plant adaptation to stress conditions (Gigon et al. 2004). Up-shifts in temperature increase the  
93 fluidity of the cytoplasmic membrane and causes reduction of unsaturated fatty acid content  
94 and increase in saturated fatty acid content, leading to increased saturation level of fatty acids,  
95 which has been positively associated with heat tolerance (Larkindale and Huang, 2004).

96 Denaturation or dissociation of membrane proteins related to photosystem II, including 33-  
97 kDa manganese (Mn)-stabilizing protein (Yamane et al., 1998), oxygen evolving complex  
98 (OEC) (De Ronde et al., 2004) and D1, D2 proteins of the reaction center (Yamamoto Y. et al.  
99 2008) has been reported under heat stress. Several studies reported a lesser or later decrease of  
100 membrane proteins was observed in a heat tolerant line of bentgrass (*Agrostis* spp.) compared  
101 to a heat sensitive line, including those categorized to energy metabolism (ATP-synthase,  
102 Cytochrome b6f, chloroplast oxygen-evolving enhancer protein, and pyruvate dehydrogenase  
103 kinase) and antioxidant processes (catalase and peroxidase) in response to heat stress  
104 (Jespersen et al., 2015).

105 Here we used this approach using blue-native PAGE (BN-PAGE), which substantially  
106 improved recovery of dechlorinating activity after electrophoresis, resulting in higher  
107 sensitivity and enabling analysis of a wider range of substrates. The blue-native PAGE is  
108 widely used in membrane protein complexes, and it has been used successfully to  
109 characterize respiratory complexes in yeast mitochondria (Cruciat et al. 2000), photosynthetic  
110 complexes in plant (Ciambella et al. 2005), and cell envelope protein complexes in *E.coli*  
111 (Pan et al. 2010). Moreover, recent modifications have made it possible to apply this method  
112 to the study of whole protein complexes of an organism (Jha et al. 2016). The two-  
113 dimensional blue native/sodium dodecyl sulfate polyacrylamide gel electrophoresis (2D  
114 BN/SDS-PAGE) is a method to investigate protein complexes (Lasserre et al. 2012).

115 In our previous study, it was suggested that heat stress could reduce Chl content that inhibited  
116 photochemical activity and caused sharply decrease in growth and photosynthetic parameters.  
117 Additionally, we found heat-sensitive cultivars had a greater accumulation of reactive oxygen  
118 species (ROS) and malondialdehyde (MDA) that caused greater severity of damage to the  
119 photosynthetic apparatus and membrane system relative to heat-tolerant cultivars. We  
120 believed that heat-tolerant cultivars had greater a greater capacity for maintaining leaf RWC  
121 and scavenging ROS was due to better osmotic adjustment and antioxidant defences capacity,  
122 as compared with WS-6 (Zou et al., 2016 and 2017). Although photosynthetic parameters,  
123 osmotic adjustment and antioxidant defence have been well documented, limited information

124 is available on changes in membrane proteins for plant adaptation to heat stress, particularly  
125 on specific membrane proteins that could be changed conferring membrane thermostability  
126 and plant tolerance to heat stress.

127 The present study was carried out with two wucaï cultivars (heat tolerant and heat sensitive)  
128 to investigate photosynthetic capacity and membrane fatty acid composition. We isolated  
129 intact chloroplasts and obtained thylakoid membranes, and analysed membrane protein  
130 complexes and differential proteins under heat stress. The objective of this study was to assess  
131 comparative adaptation changes responding to heat stress and to explore the regulation  
132 mechanism from fatty acid composition and differential expression proteins of heat-tolerant  
133 cultivar, which could provide a guidance and theoretical basis for wucaï tolerant breeding.

## 134 **Materials and methods**

### 135 **Plant cultivation and treatments**

136 Wucai seeds of WS-1 (heat-tolerant) and WS-6 (heat-sensitive) were supplied by the  
137 Vegetable Genetics and Breeding Laboratory at Anhui Agricultural University, China. Young  
138 seedlings were planted in plastic pots filled with sterilized soil and grown at 20/12 °C  
139 day/night ) with a 15h photoperiod, a photon flux density (PFD) range of 300-500 $\mu\text{mol m}^{-2} \text{s}^{-1}$ ,  
140 and a relative humidity range of 60-70% in a green house. When the sixth leaf was fully  
141 expanded (approximately 4 weeks old), the uniform size seedlings were adapted in an  
142 illuminated incubation chamber (GXZ-260C) for 2 d before treatment. Seedlings were  
143 randomly separated into four groups for heat stress treatment. The day/night (d/n)  
144 temperatures of the five treatments were as follows:

- 145 (a) Cont, 20 °C/12 °C (d/n) treatment for 3 days
- 146 (b) TS, 27 °C/18 °C (d/n) stress treatment for 3 days
- 147 (c) TF, 34 °C/24 °C (d/n) stress treatment for 3 days
- 148 (d) FO, 41 °C/30 °C (d/n) stress treatment for 3 days
- 149 (e) After 41 °C/30 °C (d/n) stress treatment for 3 days, transferred to the control level for 3  
150 days.

### 151 **Morphological parameters**

152 Morphological parameters include plant height, stem diameter, leaf length, leaf width and  
153 single plant weight. Morphological parameters were obtained from ten seedlings in each  
154 replication. Plant height was measured from cotyledonary node to the top with a ruler. Stem  
155 diameter was measured at the cotyledonary node using a vernier caliper. After the  
156 measurements, all seedlings were cut at the bases of their stems and rinsed thoroughly with  
157 distilled water, and single plant weight was measured after removal of residual moisture. Leaf  
158 area and RWC were measured from 10 seedlings in each replication. Data were averaged  
159 from three replicates. The area of the 3rd expanded leaf (from the core) was measured with an  
160 Expression 1680 scanner (Epson, Sydney, Australia). Leaf RWC was measured according to

161 the method of Barrs and Weatherley (1962). After fresh weight (FW) was measured, the  
162 leaves were floated on deionised water for 6h under low irradiance. Then the leaves were  
163 blotted to wipe off excess water, weighed to record fully turgid weight (TW), and then  
164 subjected to an oven drying at 75 °C for 72h to record the dry weight (DW). Leaf RWC was  
165 calculated by the following formula: Leaf RWC(%) = (FW-DW)/(TW-DW)×100%.

#### 166 **Chlorophyll content.**

167 The Chl contents were measured as described by Strain and Svec (1966) with some  
168 modifications. Fresh leaf samples (0.2 g) were obtained from the fragments of the third leaves  
169 in each treatment group and incubated for 24 h in the dark at 4 °C in 25 mL of acetone and  
170 ethanol and water at 4.5:4.5:1 (v/v/v); after filtration, absorbance values were then recorded at  
171 649 and 665 nm. The Chl concentrations were calculated using the following formulae: Chl a  
172 = 13.95 A<sub>665</sub> - 6.88 A<sub>649</sub>; Chl b = 24.96 A<sub>649</sub> - 7.32 A<sub>665</sub>; and Chl a+b = Chl a + Chl b.

#### 173 **Photosynthetic parameters.**

174 The gas exchange parameters evaluated were P<sub>N</sub>, G<sub>S</sub>, C<sub>i</sub>, and E. Measurements were taken  
175 with a portable photosynthesis system (LI-6400, LI-COR Inc., Lincoln, NE, USA) on fully  
176 expanded third leaf. Ten replicate measurements were taken per treatment on a clear day  
177 between 09:00 am and 11:00 am. The conditions during measurements were 25 °C, RH of  
178 70%, external CO<sub>2</sub> concentration of 380 ± 10 μmol mol<sup>-1</sup>, and light intensity of 1,000 μmol  
179 photons m<sup>-2</sup> s<sup>-1</sup>.

#### 180 **Chlorophyll fluorescence parameters**

181 The Chl fluorescence parameters were measured using a handheld portable fluorometer  
182 (Pocket PEA). Fully expanded third leaf was dark-adapted for 30 min prior to measurement.  
183 The different steps of the OJIP transient determined with the Photon Systems Instruments  
184 include fluorescence intensity at 50 ms considered as the initial fluorescence value, F<sub>0</sub>;  
185 maximum fluorescence level of the OJIP transient (F<sub>M</sub>) measured under saturating light  
186 conditions while intermediate fluorescence values were measured at 300 ms, 2 ms, and 60 ms,  
187 and labelled as F<sub>300ms</sub>, F<sub>j</sub> and F<sub>i</sub> respectively (Strasser et al. 2000). The OJIP transient was  
188 analysed with the JIP-test (Strasser et al. 2000, 2004). The test provides several parameters



189 characterising the photosynthetic samples including estimates of energy fluxes per active  
190 reaction centre, and estimates of the probability/efficiencies of energy flow in the PSII  
191 (Strasser et al. 2000, 2004).

#### 192 **Fatty acid composition of thylakoid membranes**

193 Thylakoid membrane lipids were separated from the isolated thylakoid membranes and the  
194 fatty acids were analysed according to the method of (Zhang et al. 2010). The lipids extracts  
195 were separated by gas chromatography (HP6890, Agilent). An Agilent HP-INNOWax  
196 column (33m× 0.25mm) was packed with polyethylene glycol. Hydrogen flame ionization  
197 was detected at 230 °C, and the column temperature was programmed to rise from 170 °C to  
198 210 °C at 5 °C per min. Chromatograms were recorded and peak areas were calculated to  
199 measure the fatty acids levels. Peaks were identified by comparisons against several external  
200 qualitative standards.

#### 201 **Isolation and fractionation of chloroplast.**

202 Intact chloroplasts from the third fully expanded leaves were isolated and purified on percoll  
203 gradients according to the method of (Shu et al. 2015). To obtain the thylakoid membranes,  
204 the intact chloroplasts were ruptured in 50mM Hepes-KOH (pH 7.6) and 2mM MgCl<sub>2</sub> at 4 °C  
205 and the thylakoid membranes were collected by centrifugation at 14, 000g for 15min.

#### 206 **Solubilization of thylakoid membrane proteins.**

207 Thylakoid membranes were resuspended in solubilisation buffer containing 25 mM BisTris-  
208 HCl (pH 7.0), 20% glycerol and 2% n-dodecyl-β-D-maltoside (Sigma). After incubation for  
209 30 min on ice, samples were centrifuged at 14, 000g for 3 min to remove insoluble material.  
210 The supernatant was supplemented with a certain volume of sample buffer [1% (w/v)  
211 Coomassie brilliant blue G-250, 0.1 M BisTris-HCl, pH 7.0, 30% sucrose and 0.5 M 6-amino-  
212 n-caproic acid]. Dye-labelled protein samples were directly loaded onto Blue-native gels.

#### 213 **Two-dimensional Blue-native/SDS-polyacrylamide gel electrophoresis.**

214 Two-dimensional Blue-native/SDS-polyacrylamide gel electrophoresis (2D BN/SDS-PAGE)  
215 was carried out as described by Reisinger & Eichacker<sup>49</sup> with minor modifications. The first  
216 dimension, BN-PAGE, is a native polyacrylamide gel in which a gradient gel of 5%–13.5%

217 acrylamide was used. The anode buffer contained 50 mM BisTris-HCl, pH 7.0 and the  
218 cathode buffer contained 50 mM Tricine, 15 mM BisTris and 0.01% (w/v) Coomassie  
219 brilliant blue G-250. The gel was run at 4 °C. When the BN-PAGE was completed, the gel  
220 was equilibrated in 6 M urea, 5% (w/v) SDS, 10% β -mercaptoethanol, 20% (v/v) glycerol,  
221 and 50 mM Tris-HCl (pH 7.0) for 20 min. After washing with deionized water for three times,  
222 individual lanes were cut and inserted into the gel loading hole of the second dimension,  
223 SDS-PAGE, which was carried out as described by Laemmli<sup>50</sup>. Protein spots were visualized  
224 using Coomassie brilliant blue R-250.

#### 225 **Image acquisition and data analysis.**

226 The stained gels were scanned using the Image scanner III (GE Healthcare). The images were  
227 analyzed with Imagemaster<sup>TM</sup> 2D Platinum software version 6.0 (GE Healthcare). Three gels  
228 for each treatment from three independent experiments were used for the analysis. The  
229 intensities of spots were quantified based on the ratio of the volume of a single spot to the  
230 whole set of spots. Only spots with quantitative changes of at least 1.5-fold in abundance that  
231 were reproducible in three replicates were used for mass spectrometry.

#### 232 **Statistical analysis.**

233 All data were statistically analyzed with SAS 13.0 software (SAS Institute, Inc., Cary, NC,  
234 USA) using Duncan's multiple range test at a 0.05 level of significance.

## 235 **Results**

### 236 **Morphological parameters analyses**

237 With increasing temperature, 27 °C/18 °C controls slightly influence in fresh weight, dry  
238 weight, plant height, stem diameter, leaf width and leaf length. In contrast, 34 °C/24 °C  
239 controls and 41 °C/30 °C controls significantly inhibited the growth of plants. Fresh weight,  
240 dry weight, plant height and stem diameter of both cultivars were decreased gradually  
241 showing decreases of 9.58%、12.73%、8.07%、7.77% and 16.11%、16.50%、16.23%、  
242 20.76% in WS-1 and WS-6 at 40 °C, respectively, compared to 20 °C controls (Table 1).The  
243 leaf width and leaf length were sharply decreased of 5.80%、3.53% and 9.19%、6.84%.  
244 Moreover, larger increases in fresh weight、dry weight、plant height、stem diameter、leaf  
245 width and leaf length occurred at 35 °C and 40 °C in WS-6, compared with WS-1.

### 246 **Leaf RWC**

247 The general trend in leaf RWC response to heat stress was similar between both cultivars,  
248 while it differed in the magnitude of change (Fig 2). At 27 °C, leaf RWC was not affected in  
249 either of the cultivars. However, it was decreased by 4.52% and 8.22% under 35 °C and 40 °C  
250 stress conditions in WS-1, while the decrease was by 11.95% at 34 °C and 16.15% at 41 °C in  
251 WS-1, respectively. After plants were transferred to moderate temperature condition for 3  
252 days, average recovery rates were 98.29% of WS-1 and below 87.90% of WS-6. While the  
253 recovery of leaf RWC from 41 °C heat stress, WS-1 occurred more quickly and mostly  
254 reached that of the control level.

### 255 **Chlorophyll content**

256 In both wucaï cultivars, the changes in Chl a、Chl b、Chl a+b and carotenoids contents  
257 showed the same trends in response to heat stress (Fig 3). Relative to the controls, Chl a、Chl  
258 b、Chl a+b and carotenoids contents was not significantly affected in WS-1 and WS-6 under  
259 27 °C, while at 34 °C, they were decreased 3.26%、4.00%、3.52%、6.03% and 6.18%、  
260 5.91%、6.10%、11.44% respectively. As the temperature increased to 41 °C, the Chl a、Chl  
261 b and Chl a+b contents were sharply decreased by 8.12%、9.84%、8.73%、12.15% and

262 11.57%、15.08%、12.78%、23.60% in WS-1 and WS-6 respectively. Moreover, larger  
263 decreases in Chl a、Chl b、Chl a+b and carotenoids contents occurred at 34 °C and 41 °C in  
264 WS-6, compared with WS-1. After plants were transferred to moderate temperature condition  
265 for 3 days, average recovery rates in Chl a、Chl b、Chl a+b contents were 97.64%、98.77%、  
266 98.03%、100.57% of WS-1 and below 90.06%、88.04%、89.36%、91.89% of WS-6.  
267 While the recovery from 41 °C heat stress, WS-1 occurred more quickly and mostly reached  
268 that of the control level.

### 269 **Photosynthetic parameters**

270  $P_N$  was unchanged in either cultivars at 27 °C, but significantly decreased in both cultivars  
271 under 34 °C and 41 °C, relative to their respective controls (Fig 4 A). At 34 °C,  $P_N$  was  
272 significantly decreased by 16.70% in WS-1, while decreased by 24.14% in WS-6. When the  
273 temperature increase to 41 °C, larger decreases in  $P_N$  occurred at 41 °C decreased by 41.89%  
274 in WS-6 and decreased by 28.65% in WS-1, compared with their respectively controls. After  
275 recovery, average recovery rates were 92.00% of WS-1 and below 70.06% of WS-6.

276 With the temperature increased,  $C_i$  of heat-sensitive WS-6 was increased significantly, while  
277 heat-tolerant WS-1 was unaffected by 34 °C. At 41 °C,  $C_i$  was significantly decreased by 29.12%  
278 in WS-1, while decreased by 44.90% in WS-6 (Fig 4 B). When the plants were transferred to  
279 moderate temperature condition for 3 days later, larger increases of  $C_i$  were presented in WS-  
280 6 of 21.46% relative to those in WS-1 of 7.58%.

281 The  $G_s$  values increased to maximum at 27 °C and then declined with increasing temperature  
282 in WS-1, while decreased at 27 °C in WS-6. Larger decreases of  $g_s$  were presented in WS-6 at  
283 34 °C and 41 °C relative to those in WS-1 (Fig 4 C). Average recovery rates were 94.84% of  
284 WS-1 and below 73.13% of WS-6.

285 The response of  $E$  to heat stress were similar in both cultivars. They were significantly  
286 increased at 34 °C and decreased at 41 °C, relative to their respective controls (Fig 4 D). At  
287 34 °C,  $E$  was significantly increased by 24.84% in WS-1, while increased by 6.84% in WS-6.

288 When the temperature increase to 41 °C, larger decreases in  $E$  occurred at 41 °C decreased by  
289 13.43% in WS-6 and decreased by 4.36% in WS-1, compared with their respectively controls.

### 290 **Chlorophyll fluorescence parameters**

291 A typical fast chlorophyll fluorescence rise kinetics shows a sequence of phases from the  
292 initial ( $F_0$ ) to the maximal ( $F_M$ ) fluorescence value, which have been labeled step O (20  $\mu$ s), J  
293 ( $\sim$ 2 ms), I ( $\sim$ 30 ms), and P (equal to  $F_M$ ). At 20 °C, both wucaï cultivars showed a typical O-J-  
294 I-P steps. Moreover, at 41 °C, the K-step appeared in WS-6 cultivars, while WS-1 still showed  
295 a typical O-J-I-P steps (Fig 5).

296 The  $F_0$  values of both cultivars were significantly increased at higher temperatures, especially  
297 in WS-6. At 41 °C,  $F_0$  values were, respectively, increased by 23.94% and 34.33% in WS-1  
298 and WS-6, relative to their controls.

299 WS-1 had similar trend of  $F_V/F_M$  that of WS-6 under normal condition in leaves (Fig 6 A). At  
300 27 °C,  $F_V/F_M$  values were both increased, but had no significantly differences to their controls.  
301 However, 34 °C and 41 °C heat stress resulted in declines in  $F_V/F_M$  of two cultivars (Fig 6 B).  
302 Compared to their respective controls, the  $F_V/F_M$  in WS-1 were decreased by 5.75% and  
303 9.91%; those of WS-6 were decreased by 9.39% and 27.30%. The decrease extent of  $F_V/F_M$  of  
304 WS-6 was higher than that of WS-1.

305 Moreover, the  $F_0$  values and  $F_V/F_M$  values in WS-1 was similar to that of its control after  
306 recovery, while WS-6 had obviously increases of 21.43% and 5.77% respectively (Fig 6).

307 Based on RC, there were no significantly changes in  $ABS/RC$ 、 $TR_0/RC$ 、 $DI_0/RC$ 、 $ET_0/RC$   
308 for either cultivars at 27 °C(Fig 7). At high temperature,  $ABS/RC$ 、 $TR_0/RC$ 、 $DI_0/RC$  were  
309 significantly increased, whlie  $ET_0/RC$  were decreased. At 41 °C,  $ABS/RC$  of WS-1 and in  
310 WS-6 were, respectively, increased by 26.12% and 48.13%,  $TR_0/RC$  of WS-1 and in WS-6  
311 were, respectively, increased by 31.54% and 61.03%,  $DI_0/RC$  of WS-1 and in WS-6 were,  
312 respectively, increased by 64.41% and 122.42%, and  $ET_0/RC$  of WS-1 and in WS-6 were,  
313 respectively, decreased by 15.11% and 28.62%.

314 Once stress conditions were removed, ABS/RC、TR<sub>0</sub>/RC、DI<sub>0</sub>/RC、ET<sub>0</sub>/RC of WS-1 were  
315 almost recovered to the control level, while of WS-6 were still had significantly differences  
316 compared with their controls (Fig 7).

317 The RC/ CS<sub>M</sub> values of both cultivars were significantly decreased at higher temperatures,  
318 especially in WS-6 (Fig 8). There were no significantly changes for either cultivars at 27 °C.  
319 But at 34 °C, RC/ CS<sub>M</sub> values were, respectively, decreased by 10.63% and 15.42% in WS-1  
320 and WS-6, relative to their controls. With the temperature increased to 41 °C, RC/ CS<sub>M</sub> values  
321 were, respectively, decreased by 10.63% and 15.42% in WS-1 and WS-6, relative to their  
322 controls. After recovery, the values of WS-1 were reached the control level, while the values  
323 of WS-6 still have large difference compared to the control.

324 Based on CS<sub>M</sub>, there were no significantly changes in ABS/CS<sub>M</sub>, DI<sub>0</sub>/CS<sub>M</sub>, ET<sub>0</sub>/CS<sub>M</sub> for either  
325 cultivars at 27 °C. But the TR<sub>0</sub>/CS<sub>M</sub> were decreased at 27 °C in both wucai cultivars. At high  
326 temperature, ABS/CS<sub>M</sub>, TR<sub>0</sub>/CS<sub>M</sub>, DI<sub>0</sub>/CS<sub>M</sub> were significantly increased, while ET<sub>0</sub>/CS<sub>M</sub>  
327 were decreased (Fig 9). At 41 °C, ABS/CS<sub>M</sub>, TR<sub>0</sub>/CS<sub>M</sub>, ET<sub>0</sub>/CS<sub>M</sub> of WS-1 were, respectively,  
328 decreased by 14.75%, 24.29% and 21.78% in WS-1, while were respectively decreased by  
329 28.48%, 41.34%, 50.61% in WS-6. Additionally, DI<sub>0</sub>/CS<sub>M</sub> of WS-1 and in WS-6 were,  
330 respectively, increased by 18.49% and 34.33% under 41 °C heat stress.

331 The levels of ABS/CS<sub>M</sub> and DI<sub>0</sub>/CS<sub>M</sub> in WS-1 returned to the control values when plants  
332 subjected to heat stress were transferred to the suitable environment for 3 days. However, the  
333 levels of TR<sub>0</sub>/CS<sub>M</sub>, ET<sub>0</sub>/CS<sub>M</sub> in WS-1 and ABS/CS<sub>M</sub>, TR<sub>0</sub>/CS<sub>M</sub>, DI<sub>0</sub>/CS<sub>M</sub>, ET<sub>0</sub>/CS<sub>M</sub> in WS-6  
334 were still had significantly differences compared with their controls (Fig 9).

335 PI<sub>ABS</sub> is a very sensitive indicator of the physiological status of plants subjected to  
336 environmental stress. Following heat stress, PI<sub>ABS</sub> was decreased in both varieties. The PI<sub>ABS</sub>  
337 values of both cultivars were sharply decreased at 41 °C, especially in WS-6, decreased by  
338 71.50% compared to the control (Fig 10). Moreover, after translated to the control level, WS-  
339 1 had higher recovery rate than WS-6.

340 **Fatty acid composition of thylakoid membranes**

341 The fatty acids of thylakoid membrane lipids of wucai leaves were separated and analyzed by  
342 gas chromatography. As shown in Table 2, two saturated fatty acids (palmitic acid, and stearic  
343 acid) and four unsaturated ones (palmitoleic acid, oleic acid, linoleic acid, and linolenic acid)  
344 were the main fatty acids among the thylakoid membrane lipids. Specifically, in response to  
345 high temperature treatment, in WS-1, palmitic and stearic acid content was increased by 55.35%  
346 and 65.20%, whereas palmitoleic acid, oleic acid, linoleic acid, and linolenic acid content was  
347 decreased by 11.47%, 30.01%, 18.63% and 34.66% respectively, compared with control  
348 plants. While in WS-6, palmitic and stearic acid content was increased by 88.80% and  
349 31.96%, whereas palmitoleic acid, oleic acid, linoleic acid, and linolenic acid content was  
350 decreased by 1.41%, 4.80%, 3.32% and 22.50% respectively, compared with control plants.  
351 When exposed to heat stress for 3 days, High temperature stress significantly increased  
352 saturated fatty acid levels, but decreased all of the unsaturated fatty acid content、 the ratio of  
353 unsaturated to saturated fatty acids and IUFA. After plants were transferred to moderate  
354 temperature condition for 3 days, the ratio of unsaturated to saturated fatty acids and IUFA  
355 respectively average recovery rates were 90.38% and 96.45% of WS-1 plants and below  
356 76.32% and 88.89% of WS-6 plants. All the results suggest that the plant alleviates heat  
357 stress-induced thylakoid membrane lipid peroxidation by enhancing unsaturated fatty acid  
358 content.

#### 359 **Blue native (BN) /SDS-PAGE electrophoresis.**

360 To identify heat stress mediated thylakoid membrane proteins, we carried out a comparative  
361 proteomic analysis of thylakoid membranes after 3 days of treatment. Protein complexes were  
362 first solubilized from thylakoid membranes and then separated by BN-PAGE. After the first  
363 dimensional separation, seven major protein complexes were obtained (Fig 11). Mass  
364 spectrometric analysis identified the complexes as supercomplexes, PSI-LHCII/PSII  
365 monomer, PSII monomer, CP43 less PSII/ATP synthase, LHCII trimer, LHCII monomer and  
366 ATP synthase. With temperature increased, heat stress decreased levels of PSII protein

367 complex, monomeric LHCII bands and ATP synthase bands, but increased trimeric LHCII  
368 bands. WS-1 had slightly change compared to WS-6 under high temperature stress (Fig 12).  
369 To fingerprint these complexes, BN-PAGE gels were excised and layered onto PAGE gel  
370 slabs and then subjected to SDS-urea-PAGE followed by Coomassie blue G-250 staining.  
371 This separation enabled visualization of the subunit patterns of the complexes . Analysis of  
372 the BN-PAGE gel using ImageMaster 2D Platinum software revealed more than 60 CBB-  
373 stained protein spots associated with molecular masses of 14.4-116 kDa. Of these, 15 protein  
374 spots differentially regulated in response to WS-1 and WS-6 under heat stress were excised  
375 from the gels and identified (Fig 13). Differential proteins including PS I P700 chlorophyll ,  
376 chlorophyll a-b binding, PS II , D2, CP43, PS I , ATP synthase beta subunit and ATP synthase  
377 alpha subunit (Table 4).



## 378 **Discussion**

379 It is well known that high temperature can severely inhibited plant growth. It was reported that  
380 heat stress resulted in reduction on plant height, stem diameter, leaf width, leaf length and  
381 biomass in plants (Garruna-Hernández et al., 2014; Nayyar et al., 2014; Siddiqui et al., 2015).  
382 In this study, wucaï cultivars responded comprehensively in terms of growth and  
383 physiological characteristics and differential resistance to heat stress. The heat stress  
384 exhibited a negative effect on both wucaï cultivars. Plant height, stem diameter and single  
385 plant weight (fresh weight and dry weight) were significantly decreased under high  
386 temperature treatment (Table 1). This might be caused by a reduction in the relative growth  
387 rates of stalk and stem due to decreased net assimilation and the loss of turgidity and RWC  
388 (Fig 2) under heat stress(Wahid 2007., Srivastava et al. 2012). Leaf RWC has been  
389 established as an indicator of state of water balance of plants essentially in terms of the  
390 physiological consequences of cellular water deficit (Wahid and Close 2007, Kumar et al.  
391 2008, Kesici et al., 2013). In both cultivars, RWC declined linearly from ambient to modest  
392 temperature. Among the cultivars, WS-1 exhibited the higher RWC while WS-6 had the  
393 lower RWC under heat stress (Fig 2). The high level of temperature stress might be altered  
394 cell division and cell elongation resulted in reduced leaf length and leaf width in both  
395 cultivars (Table 1). In this study, larger morphological changes occurred in WS-6 than in WS-  
396 1, indicating that the effects of high temperatures on fresh weight, dry weight, plant height,  
397 stem diameter, leaf width and length were cultivar dependent in wucaï (Table 1).

398 In several studies, heat stress led to reductions in photosynthetic pigment contents (Marchand  
399 et al. 2005) and impaired Chl biosynthesis in plastids (Dutta et al. 2009). In both cultivars,  
400 Total Chl synthesis was impaired with increasing temperature (Fig 3). The decrease in total  
401 Chl biosynthesis in wucaï cultivars may be due to increased activity of the chloroplast  
402 degrading enzyme, induced changes in ultrastructure of chloroplasts, and the chloroplasts  
403 could gradually lose its capacity to capture radiation energy (Kudoh and Sonoike 2002). Also,  
404 heat stress could cause lipid peroxidation of chloroplasts and thylakoid membranes  
405 (Mohammed and Tarpley 2010) and various changes in chloroplasts (Lipiec et al., 2013).

406 Moreover, WS-6 had a higher decline in chlorophyll content than WS-1 under each of high  
407 temperature treatments (Fig 3). Because of total Chl is an important biomolecule in plants  
408 photosynthesis. Additional, in our study, the different level of photosynthetic parameters and  
409 chlorophyll fluorescence parameters may due to different Chl content in two wucaï cultivars  
410 under heat stress (Fig 4-10). These results suggest that the heat-tolerant cultivar has better  
411 self-protection processes for resisting heat stress.

412 Several studies have shown that photosynthesis is very sensitive to high temperatures, and is  
413 often the first cellular function to be impaired by heat stress (Tan et al. 2011; Greer and  
414 Weedon 2012). Furthermore, plants grown under temperature stress usually show a decrease  
415 in photosynthesis due to stomatal closure, chloroplast impairment, or limitation of the carbon  
416 assimilation (Pastenes and Horton 1996, Wise and Olson 2004). In this study, the high  
417 temperature stress, especially 41 °C, caused decreases in  $P_N$ ,  $G_s$ , and  $E$ , whereas the  $C_i$  value  
418 was increased after 3 days (Fig 4). These results indicated that the high temperature caused  
419 the reduction of  $P_N$  and this reduction was mainly caused by non-stomatal limitation under  
420 severe heat stress due to higher  $C_i$  with lower  $G_s$  (Ploschuk et al. 2014), but stomatal  
421 limitation would occurred under milder stress conditions (Wu et al. 2001). Moreover,  
422 photosynthetic parameters exhibited greater changes in WS-6 than in WS-1 under heat stress.  
423 Our results confirmed that the heat stress mediated decline of  $P_N$  was also cultivar dependent.  
424 Compared with the heat-sensitive cultivar, the heat-tolerant cultivar was better able to  
425 regulate photosynthesis under heat stress. Net photosynthetic rate in WS-6 had lower recovery  
426 ratios compared with WS-1 indicating that WS-1 was more sensitive to the temperature stress  
427 than WS-6.

428 One of the most sensitive components of the photosynthetic apparatus in plants to high  
429 temperatures is PSII (Srivastava et al. 1997), and it is considered to play a key role in  
430 photosynthesis under environmental stress (Baker and Rosenqvist 2004). PSII activity was  
431 greatly reduced or completely arrested under heat stress (Morales et al. 2003). Heat stress  
432 could caused  $F_0$  increases duo to the physical separation of the PSII RCs from their associated  
433 pigment antennae resulting in blocked energy transfer to the PSII traps (Fig 6 A). Thus, heat

434 inactivation of PSII may be accompanied by the aggregation and subsequent dissociation of  
435 the light-harvesting complex (Li et al., 2009). In our study, larger decreases in Fv/Fm were at  
436 higher temperatures (Fig 6 B), implying that photoinhibition occurred under heat stress and  
437 was magnified by higher temperatures. The degree of photoinhibition appeared to be greater  
438 in the heat-sensitive cultivar than in the heat-tolerant one.

439 A typical fast chlorophyll fluorescence rise kinetics shows a sequence of phases from the  
440 initial ( $F_0$ ) to the maximal ( $F_M$ ) fluorescence value, which have been labeled step O (20  $\mu$ s,  
441 all RCs open), J (~2 ms), I (~30 ms), and P (equal to  $F_M$  when all RCs are closed) (Strasser  
442 and Strasser 1995). Besides the basic O-J-I-P steps, others also appear in certain conditions,  
443 such as the K-step, relating to the inactivation of the oxygen-evolving complex  
444 (OEC) (Tsimilli-Michael et al., 1999; Strasser et al., 2004). On the other hand, one to two of  
445 the basic O-J-I-P steps will disappear in some stress situations. Under strong heat stress  
446 (above 44  $^{\circ}$ C), the J- and I-steps disappear with a concomitant appearance of the K peak as a  
447 predominant step in fluorescence rise kinetics because the OEC has been damaged completely  
448 (Strasser et al., 2004; Chen et al., 2016). Our experiments show that appearance of the K-step  
449 is the major change in fast chlorophyll fluorescence rise kinetics of croftonweed leaves  
450 exposed to high temperature (Fig 5). The phenomenological appearance of the K-step is a  
451 typical characteristic of the fluorescence rise kinetics in heated-samples, which is specifically  
452 attributed to the OEC destruction by release of the manganese cluster (Strasser et al., 2004). A  
453 high temperature can cause inactivation of OEC, inhibition of electron transport, and decrease  
454 in PSII photochemical efficiency (De Ronde et al., 2004; Wahid et al., 2007; Sharkey et al.  
455 2005, Allakhverdiev et al. 2008). It is reported that heat stress leads to the dissociation of the  
456 OEC causing an imbalance between the electron flow from the OEC to the RC and towards  
457 PSII acceptor side, the alternative internal electron donor such as proline can donate electrons  
458 to PSII instead of H<sub>2</sub>O (De Ronde et al. 2004; Oukarroum et al., 2013). This will result in a  
459 short-lived increase in the reduced Pheo/ $Q_A$  concentration, creating a K-peak appearing at  
460 about 300  $\mu$ s. Hence, the increasing amplitude of the K-step or  $\Delta$ K peak is associated with the  
461 OEC injury degree (Brestic et al. 2013; Strasser, 1997; Oukarroum et al. 2016). In fact, the

462 OEC with manganese cluster is very sensitive to heat stress, and the OEC damage is one of  
463 the earliest events affected by heat stress. While the appearance of a conspicuous K peak  
464 requires higher temperature intensities (above 40 °C) or long heat duration in moderate  
465 temperature at 40 °C. Just above 40 °C high temperatures, a significant increase of the level of  
466 K-step ( $V_K$  or  $W_K$ ) or  $\Delta K$  peak ( $\Delta W_K$ ) was observed (Chen et al., 2016). In our study, tolerant  
467 WS-1 plants had a less increase of the  $\Delta K$  peak than sensitive WS-6 plants at different heat  
468 stress level (Fig 5).

469 In addition to the widely used  $F_0$  and  $F_v/F_M$  parameter, we studied the JIP-test parameters  
470  $ABS/CS_M$ ,  $DI_0/CS_M$ ,  $TR_0/CS_M$ ,  $RC/CS_M$  and  $ET_0/CS_M$  which can be used to explain the  
471 stepwise flow of energy through PSII at the crosssection for maximum fluorescence ( $CS_M$ )  
472 level. According to Sinsawat et al. (2004), decreased  $F_v/F_M$  was primarily due to the decrease  
473 in  $ABS/CS$ ,  $ET_0/CS$ ,  $TR_0/CS$  and the increase in  $DI_0/CS$ . A significant decrease in  $RC/CS$ ,  
474  $ABS/CS$  and  $TR_0/CS$  further demonstrates that high temperatures indeed inactivated PSII RCs,  
475 reduced the function antenna size, and declined the specific rate of the exciton trapped by  
476 open RCs (Fig 8). We also notice that partial inactivation of PSII RCs in WS-6 plants already  
477 starts in mild heat stress at 34 °C, moreover, complete inactivation of PSII RCs happens at  
478 41 °C severe elevated temperature (Fig 8). In this study,  $ABS/CS$ ,  $ET_0/CS$ ,  $TR_0/CS$   
479 significantly decreased under heat stress, while  $DI_0/CS$  increased (Fig 9), which was in  
480 accordance with previous studies (Song et al. 2013; Luo et al. 2014). It is proposed that the  
481 decrease of  $TR_0/CS$  is mainly attributed to heat inactivation of RCs due to the dissociation of  
482 the manganese-stabilizing extrinsic 33 kDa protein from the PSII reaction center complex  
483 (Enami et al., 1994). Moreover, the increase in  $DI_0/CS$  was larger in WS-1 than in WS-6.  
484  $DI_0/CS$  has been shown to be closely associated with the onset of harmless dissipation of  
485 excess energy (Gilmore 1997). The structural and functional aspects of PSII are interrelated.  
486 Under heat stress, the damage to the photosynthetic machinery will greatly affect the  
487 energetic cooperativity between the PSII units. In addition to the JIP-test parameters based on  
488  $CS$ , we studied the others JIP-test parameters based on  $RC$ . In our study, heat stress reduced  
489  $ET_0/RC$  and increased  $DI_0/RC$ ,  $ABS/RC$  and  $TR_0/RC$  detected in both cultivars (Fig 7). A

490 consistent increase in inhibition of  $Q_A^-$  re-oxidation ( $TR_0/RC$ ) and apparent antenna size, due  
491 to inactivation of some active RCs (ABS/RC) associated with accumulation of inactive RCs  
492 and an increase of  $DI_0/RC$  was shown.  $DI_0/RC$  has been previously related to high NPQ  
493 (Strasser et al. 2000; Ajigboye, et al.2016).

494 Our data showing a temperature-dependent linear decrease in the performance index  $PI_{ABS}$  of  
495 WS-6 plants suggested that heat treatment results in a significant decrease of the overall  
496 photosynthetic activity (Fig. 10). In contrast, a higher vitality is maintained in tolerant WS-1  
497 plants heated by increased high temperatures (Fig 10).  $PI_{ABS}$  indeed can be regarded as a  
498 standard to successfully identify heat sensitivity of different croftonweed populations since it  
499 is the most sensitive experimentally derived parameter to various stress conditions. And the  
500 dramatic lowering of the overall photosynthetic activity of PSII ( $PI_{ABS}$ ) should be attributed to  
501 inactivation of RCs (RC/CS) and inhibition of light reactions(Chen et al.2016, Strasser et al.  
502 2004).

503 As the primary architecture of the cell, the membrane plays important roles in sensing  
504 environmental change, signal transduction and substance metabolism (Mittler et al., 2012;  
505 Guyot et al., 2015). High temperature increase the fluidity of the cytoplasmic membrane. To  
506 maintain membrane fluidity within an optimal range for normal biological activity, fatty acid  
507 desaturase genes which convert unsaturated fatty acids into saturated fatty acids, are down-  
508 regulated to decrease lipid unsaturation and thus decrease membrane fluidity in response to  
509 temperature up-shifts (de Mendoza, 2014; Holthuis and Menon, 2014). As cell membrane  
510 components, unsaturated fatty acids play key roles in the fluidity of cellular membranes  
511 (Mansilla et al., 2008; Ma et al., 2015). Alter the ratio of unsaturated to saturated fatty acids  
512 was responsible for the maintenance of membrane integrity and fluidity (Shu et al. 2015; Liu  
513 et al. 2017). In this study, the reduction of unsaturated fatty acid content of thylakoid  
514 membranes in both cultivars increased membrane liquidity and maintained an orderly  
515 arrangement of thylakoids. The total amount of UFA decreased while the total amount of SFA  
516 increased, yielding a lower UFA/SFA ratio that is indicative of increased membrane fluidity

517 (Table 2). Our study confirmed that changes in unsaturated fatty acids composition can  
518 improve plant tolerance against heat stress.

519 The deleterious effects of heat stress on thylakoid membrane proteins is a mechanism  
520 protecting the photosynthetic apparatus from heat-induced damage. We performed BN/SDS-  
521 PAGE electrophoresis of thylakoid membrane fractions to detect major heat-induced  
522 modifications of protein structure (Fig 11). Membrane proteins responsible for maintained  
523 ability to produce energy and metabolism, the maintenance of efficient photorespiratory  
524 pathways, and antioxidant metabolism could serve important roles in regulating leaf  
525 senescence and whole-plant responses to heat stress in plants (Busby, et al. 2006). Previous  
526 study reported that stress may interact not only with the PSII core proteins D1, D2, and CP43,  
527 but also with the LHCII antenna complex, PSI reaction centre proteins, and the ATP synthase  
528 subunit (Alfonso, et al. 2001; Shu, et al. 2015). Several other studies confirms that the  
529 transcription and translation of the LHCII supercomplex and the ATP synthase complex  
530 affected by regulating the energy balance of thylakoid membranes and in ensuring  
531 sophisticated coordination of energy excitation and dissipation (Hamdani, et al. 2011;  
532 Hubbart, et al. 2012). The protective action on PSII proteins can be explained in the  
533 modulation of synthesis and turnover of these proteins (Xue, et al. 2016; Chen, et al. 2017;).

534 In recent study, six membrane proteins exhibited up-regulation in response to heat stress in  
535 both varieties of hard fescue. They were categorized into functional groups of photosynthesis  
536 (Rubisco activase, disease resistance protein 1, OEE1), stress defense (stromal 70 kDa heat  
537 shock-related protein, disease resistance protein 1, CPN 60) and protein degradation (ATP  
538 dependent zinc metalloprotease protein) (Wang J et al. 2017). In our study, we found ten  
539 differential membrane proteins included light-harvesting Chl a/b- binding (LHC) protein ,  
540 ATP synthase subunit alpha, ATP synthase subunit beta, photosystem I P700 chlorophyll a  
541 apoprotein A2, photosystem II CP43 reaction center protein, photosystem II D2 protein and  
542 photosystem II OS from two different tolerant wucui cultivars. The phenomenon of this may  
543 because of several proteins were up-related to the same level in both wucui cultivars.

544 Chlorophyll a-b binding proteins (LHC), which are major components of light-harvesting  
545 antennae of PSII, play distinct functions for regulating light-harvesting events, such as the  
546 dissipation of excessive light and optimization of light energy utilization (Wang et al. 2015).  
547 It has been reported that plants prevent chlorophyll loss from thylakoid membranes by  
548 stabilizing photosystem complexes (Shu et al. 2015), such as induces an aggregation of the  
549 light-harvesting complex of photosystem II (Tang et al., 2007). Under heat stress or intense  
550 light, enhanced amounts of reactive oxygen species will react with proteins and lipids, and  
551 will induce various types of photodamage. Therefore, the quality and quantity control of the  
552 LHC protein complex is required to avoid photodamage by alleviating excitation energy  
553 pressure (Teramoto, H et al. 2002). In detached rice leaves, Kang et al. (2009) concluded that  
554 among thylakoid complex proteins, LHCb1, LHCb2, LHCb3 and LHCb5 were not  
555 appropriate as senescence-related protein markers due to the stability of LHCII complexes.  
556 Our present study have found that WS-1 had more LHCII protein than WS-6 under high  
557 temperature stress which was confirmed by higher  $ABS/CS_M$ ,  $TR_0/CS_M$ ,  $DI_0/CS_M$  in WS-1.  
558 ATPase are key membrane-bound enzyme complexes for ATP generation, responsible for  
559 converting ADP to ATP by using transmembrane proton gradients in the electron transport  
560 process in both photosynthesis and respiration (Hopkins, 1999). The ATPase complex  
561 consists of  $\alpha$ -subunits and  $\beta$ -subunits forming the catalytic core of the enzyme complex with  
562 the  $\beta$  subunits involved in catalytic activities and the  $\alpha$  subunits being regulatory (Lee et al.,  
563 2007). Previous study reported that heat stress could decline the abundance of all  $\alpha$ -subunits  
564 of ATPase may indicate the impairment of regulatory functions of this enzyme for ATP  
565 production under heat stress (Jespersen D et al. 2015). In our present study, both cultivars had  
566 a few abundance of the  $\alpha$ -subunits of ATPase. While WS-1 maintained a higher abundance of  
567 the  $\alpha$ -subunits of ATPase than WS-6 could contribute to more active regulatory activity for  
568 ATP production under heat stress. Unlike the  $\alpha$ -subunits of ATPase, both cultivars had greater  
569 abundance of the  $\beta$ -subunits of ATPase in heat stress (Fig. 13). As the  $\beta$ -subunit is the key  
570 element for catalytic functions of ATPase, the greater accumulation of  $\beta$ -subunits in WS-1  
571 could facilitate the maintenance of catalytic activities of ATPase for ATP production under

572 heat stress. Several other studies found that ATP synthase was impaired by heat stress  
573 (Ferreira et al., 2006; Majoul et al., 2004). The interruption of ATPase function for ATP  
574 production is a major culprit of heat stress damages in plants as many processes, including  
575 stress defense and repair mechanisms, depend on energy availability for plant survival of  
576 long-term heat stress (Crafts-Brandner and Salvucci, 2000).

577 The reaction center core of PSI contains the special chlorophyll-protein, P700, which is  
578 normally surrounded by the Chl a of the core antenna. P700 oxidation is directly linked to the  
579 protection of PSI against photoinhibition (Shimakawa, G. et al. 2016). It is reported that the  
580 most sensitive components of the photosynthetic apparatus in plants to high temperatures is  
581 PSII (Srivastava et al. 1997), while in our study, fewer abundance of the P700 proteins in  
582 WS-6 may indicated that PSII may influenced by heat stress.

583 The photosystem II (PSII) reaction center core (RCC) complex of higher plants, algae, and  
584 cyanobacteria can be subdivided into a heterodimer containing D1 and D2, the antenna  
585 proteins CP47 and CP43, and a large number of low molecular weight integral membrane  
586 proteins including the  $\alpha$  and  $\beta$  subunits of cytochrome b559 (Yamamoto Y. et al. 2008).

587 The D1 and D2 proteins form a heterodimer at the center of the PSII complex and serve as the  
588 reaction center-binding proteins. They carry essential redox components for charge separation  
589 and the subsequent electron transport reaction, such as the reaction-center chlorophyll P680  
590 (the primary electron donor), the primary electron acceptor pheophytin (Pheo), the first and  
591 second electron acceptor plastoquinones  $Q_A$  and  $Q_B$ , the secondary electron donor Tyr<sub>Z</sub>, and  
592 the  $Mn_4Ca$  cluster (Yamamoto Y. et al. 2008). It is reported that the D1 protein had close  
593 relationship between nearby proteins such as D2 protein and CP43. Once heat stress occurred,  
594 D1 protein damaged is subsequently degraded by proteolytic enzymes or forms specific  
595 aggregates with the D2 protein or CP43 (Aro et al. 1993; Yamamoto 2001). In our present  
596 study, WS-1 had greater abundance of D2 protein than WS-6 indicated that WS-1 had more  
597 complete structure. Meanwhile, WS-1 had high  $F_V/F_M$  and  $PI_{ABS}$  than WS-6 under high  
598 temperature could confirmed.



599 CP43 is a chlorophyll-protein complex that funnels excitation energy from the main light-  
600 harvesting system of photosystem II to the photochemical reaction center (Reppert, M et.al  
601 2008). In our study, ABS/CS<sub>M</sub> was sharply decreased under high temperature might be due to  
602 the fewer abundance of CP43 in WS-6, proved by degradation of antenna proteins (Fig.13).

603 The identification of proteins regulated by heat stress could lead to a better understanding of  
604 the cellular response to dehydration, which is an important and fundamental part of improving  
605 the stress tolerance of wucaï cultivars.

### 606 **Conclusion**

607 According to above data, it was demonstrated that the ability of wucaï plants to minimize the  
608 heat stress depended upon the growth self-regulation, effectiveness of the photosynthetic and  
609 chlorophyll fluorescence, membrane fatty acid composition and protien complexes,  
610 differential proteins which varied according to the plant cultivar. Our results revealed that the  
611 cultivars WS-1 relatively exhibited heat tolerance of the cultivars. Compared with the heat  
612 sensitive cultivars WS-6, WS-1 had a greater capacity for maintaining growth level,  
613 photosynthetic parameters and chlorophyll fluorescence. In summary, this study demonstrated  
614 that heat tolerance in wucaï, as evaluated by membrane stability, as well as leaf  
615 photochemical efficiency was associated with greater increase of saturate fatty acids (16:0  
616 and 18:0) content or decrease of unsaturate fatty acids (16:1, 18:1, 18:2 and 18:3) content, as  
617 well as less severe down-regulation of membrane proteins and greater up-regulation of heat  
618 responsive proteins (Fig.13). Modification of those membrane constituents could lead to  
619 improvement in heat tolerance for wucaï and other cool-season vegetable species. Those  
620 membrane constituents could also be used as biochemical markers to select for heat-tolerant  
621 germplasm due to their contribution to heat tolerance.

### 622 **Acknowledgments**

623 No conflict of interest exists in this article, and it is approved by all authors for publication.  
624 This work was funded by National Key R & D Program of China (2017YFD0101803), Major  
625 Science and Technology Projects of Anhui Province, China (17030701013) and National  
626 Natural Science Foundation of China (No. 31701910).

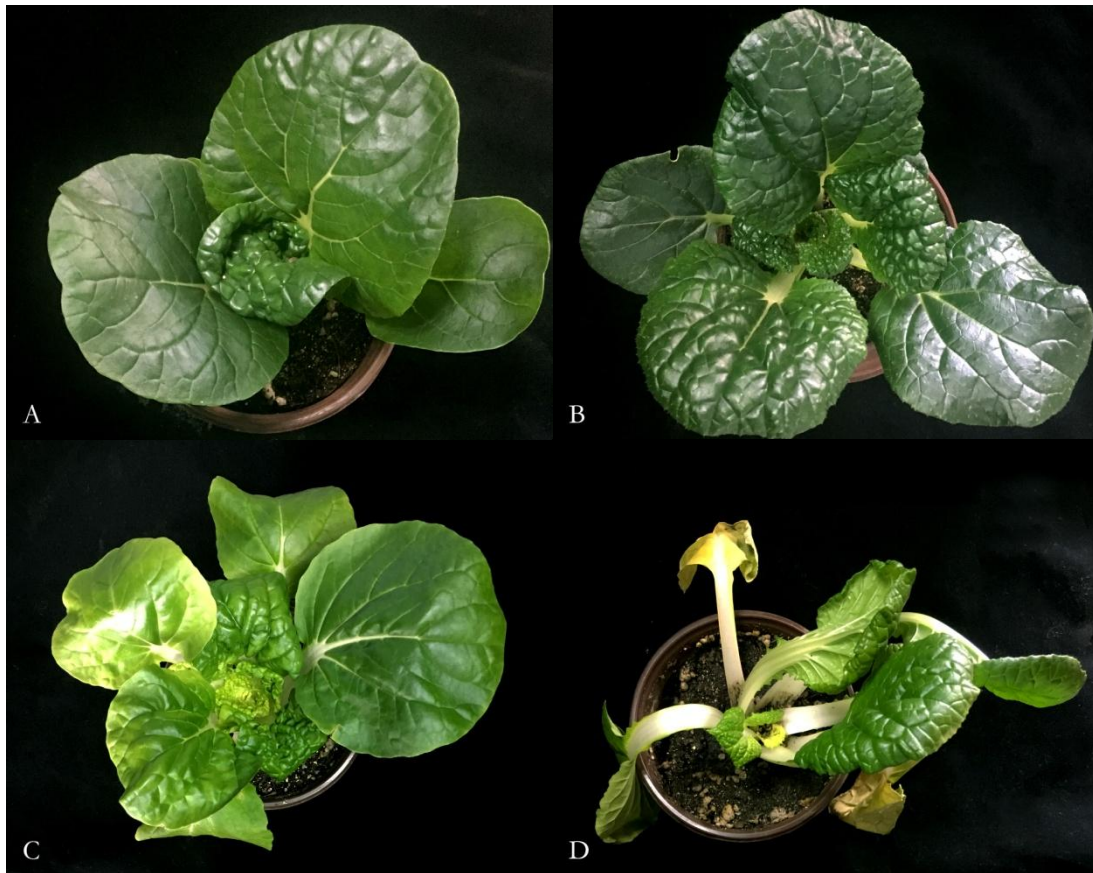

**Fig.1** Performance in wucai plants. A: WS-1 *Cont* treatment, B: WS-6 *Cont* treatment, C: WS-1 *FO* treatment, D: WS-6 *FO* treatment. *Cont* 20 °C/12 °C (d/n) treatment for 3 days], *HT* 41 °C/30 °C (d/n) stress treatment for 3 days

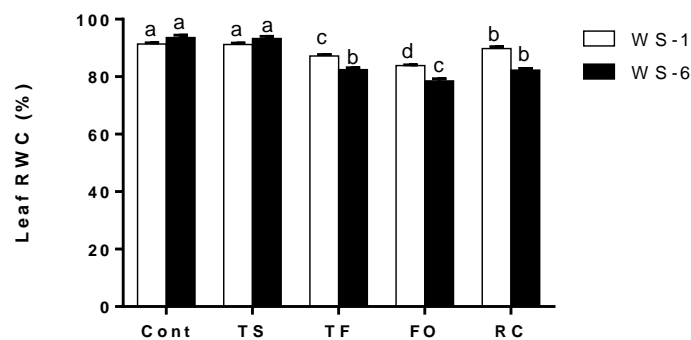

**Fig.2** Effects of heat stress on leaf relative water content (RWC) in wucai plants. Values represent the mean  $\pm$  SE (n=3). Letters indicate significant differences at  $P < 0.05$  according to Duncan's multiple range tests. *Cont* 20 °C/12 °C (d/n) treatment for 3 days, *TS* 27 °C/18 °C (d/n) stress treatment for 3 days, *TF* 34 °C/24 °C(d/n) stress treatment for 3 days, *FO*

41 °C/30 °C (d/n) stress treatment for 3 days, *Recovery* afert *HT* treatment, transferred to  
20 °C/12 °C (d/n) treatment for 3 days

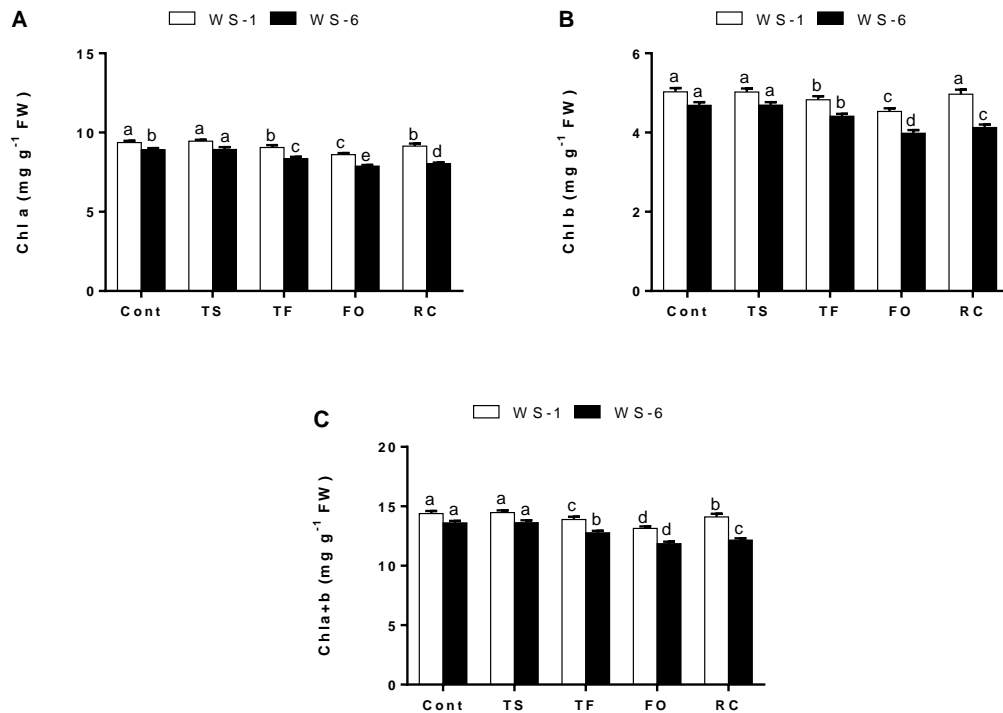

**Fig.3** Effects of heat stress on Chl a, Chl b and Chl a+b contents in wucai plants. Values represent the mean  $\pm$ SE (n=3). Letters indicate significant differences at P<0.05 according to Duncan's multiple range tests. *Cont* 20 °C/12 °C (d/n) treatment for 3 days, *TS* 27 °C/18 °C (d/n) stress treatment for 3 days, *TF* 34 °C/24 °C(d/n) stress treatment for 3 days, *FO* 41 °C/30 °C (d/n) stress treatment for 3 days, *Recovery* afert *HT* treatment, transferred to 20 °C/12 °C (d/n) treatment for 3 days

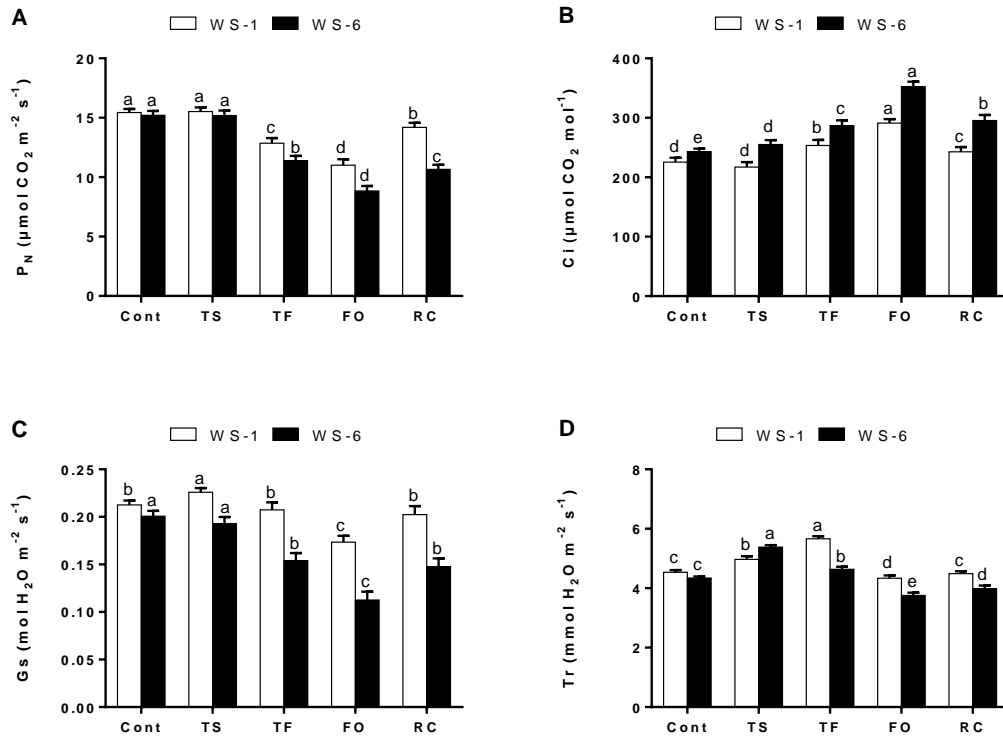

**Fig.4** Effects of heat stress on net photosynthetic rate ( $P_N$ ), stomatal conductance ( $G_s$ ), intercellular  $\text{CO}_2$  concentration ( $C_i$ ), and transpiration rate ( $E$ ) in wucai seedlings. Letters indicate significant differences at  $P < 0.05$  according to Duncan's multiple range tests. *Cont* 20 °C/12 °C (d/n) treatment for 3 days, *TS* 27 °C/18 °C (d/n) stress treatment for 3 days, *TF* 34 °C/24 °C (d/n) stress treatment for 3 days, *FO* 41 °C/30 °C (d/n) stress treatment for 3 days, *Recovery* after *HT* treatment, transferred to 20 °C/12 °C (d/n) treatment for 3 days

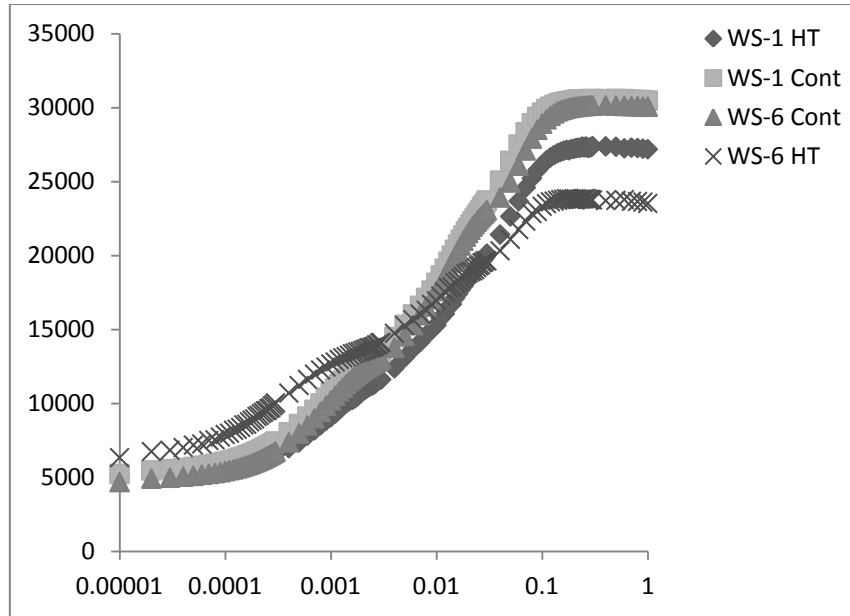

**Fig.5** Effects of heat stress on O-J-I-P steps in wucaï seedlings. *Cont* 20 °C/12 °C (d/n) treatment for 3 days, *HT* 41 °C/30 °C (d/n) stress treatment for 3 days

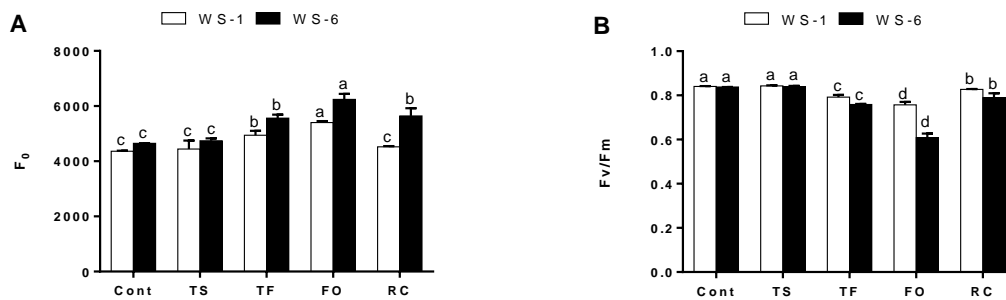

**Fig.6** Effects of heat stress on  $F_0$  and  $F_v/F_m$  in wucaï seedlings. Letters indicate significant differences at  $P < 0.05$  according to Duncan's multiple range tests. *Cont* 20 °C/12 °C (d/n) treatment for 3 days, *TS* 27 °C/18 °C (d/n) stress treatment for 3 days, *TF* 34 °C/24 °C (d/n) stress treatment for 3 days, *FO* 41 °C/30 °C (d/n) stress treatment for 3 days, *Recovery* after *HT* treatment, transferred to 20 °C/12 °C (d/n) treatment for 3 days

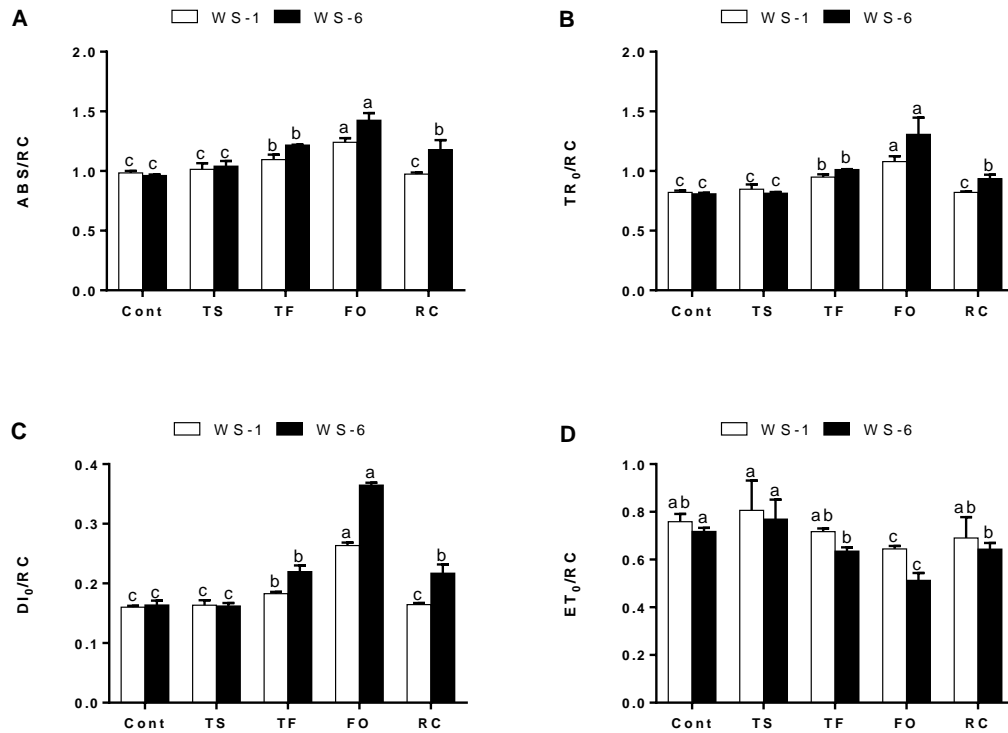

**Fig.7** Effects of heat stress on ABS/RC, TR<sub>0</sub>/RC, DI<sub>0</sub>/RC and ET<sub>0</sub>/RC in wucai seedlings. Letters indicate significant differences at P<0.05 according to Duncan's multiple range tests. *Cont* 20 °C/12 °C (d/n) treatment for 3 days, *TS* 27 °C/18 °C (d/n) stress treatment for 3 days, *TF* 34 °C/24 °C(d/n) stress treatment for 3 days, *FO* 41 °C/30 °C (d/n) stress treatment for 3 days, *Recovery* afert *HT* treatment, transferred to 20 °C/12 °C (d/n) treatment for 3 days

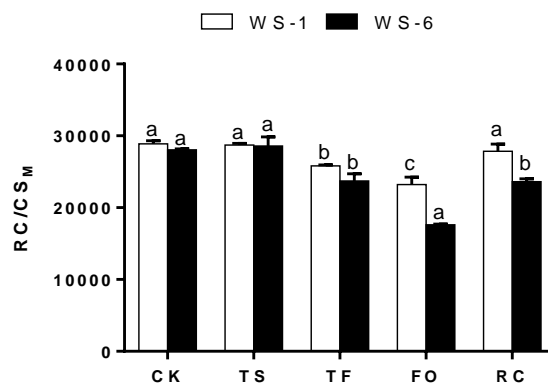

**Fig.8** Effects of heat stress on RC/ CS<sub>M</sub> in wucai seedlings. Letters indicate significant differences at P<0.05 according to Duncan's multiple range tests. *Cont* 20 °C/12 °C (d/n)

treatment for 3 days, *TS* 27 °C/18 °C (d/n) stress treatment for 3 days, *TF* 34 °C/24 °C(d/n) stress treatment for 3 days, *FO* 41 °C/30 °C (d/n) stress treatment for 3 days, *Recovery* afert *HT* treatment, transferred to 20 °C/12 °C (d/n) treatment for 3 days

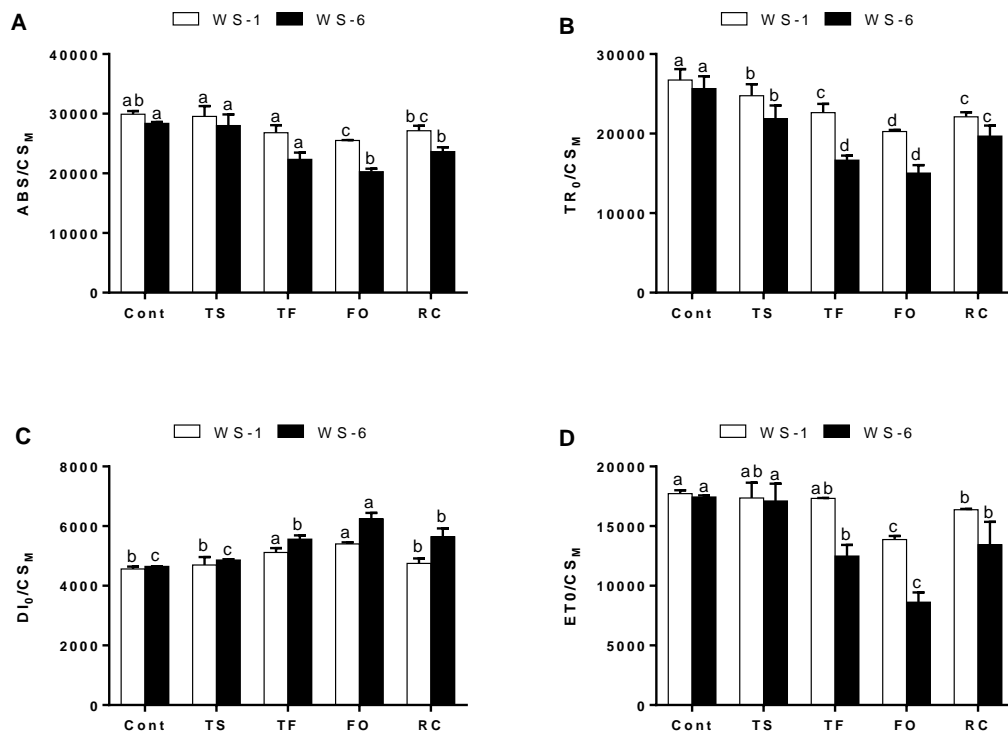

**Fig.9** Effects of heat stress on ABS/ CS<sub>M</sub>, TR<sub>0</sub>/ CS<sub>M</sub>, DI<sub>0</sub>/ CS<sub>M</sub>, ET<sub>0</sub>/ CS<sub>M</sub> in wucai seedlings.

Letters indicate significant differences at P<0.05 according to Duncan's multiple range tests.

*Cont* 20 °C/12 °C (d/n) treatment for 3 days, *TS* 27 °C/18 °C (d/n) stress treatment for 3 days,

*TF* 34 °C/24 °C(d/n) stress treatment for 3 days, *FO* 41 °C/30 °C (d/n) stress treatment for 3

days, *Recovery* afert *HT* treatment, transferred to 20 °C/12 °C (d/n) treatment for 3 days

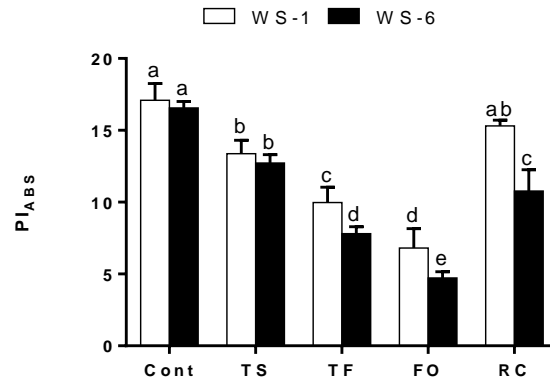

**Fig.10** Effects of heat stress on  $PI_{ABS}$  in wucai seedlings. Letters indicate significant differences at  $P < 0.05$  according to Duncan's multiple range tests. *Cont* 20 °C/12 °C (d/n) treatment for 3 days, *TS* 27 °C/18 °C (d/n) stress treatment for 3 days, *TF* 34 °C/24 °C(d/n) stress treatment for 3 days, *FO* 41 °C/30 °C (d/n) stress treatment for 3 days, *Recovery* afert *HT* treatment, transferred to 20 °C/12 °C (d/n) treatment for 3 days

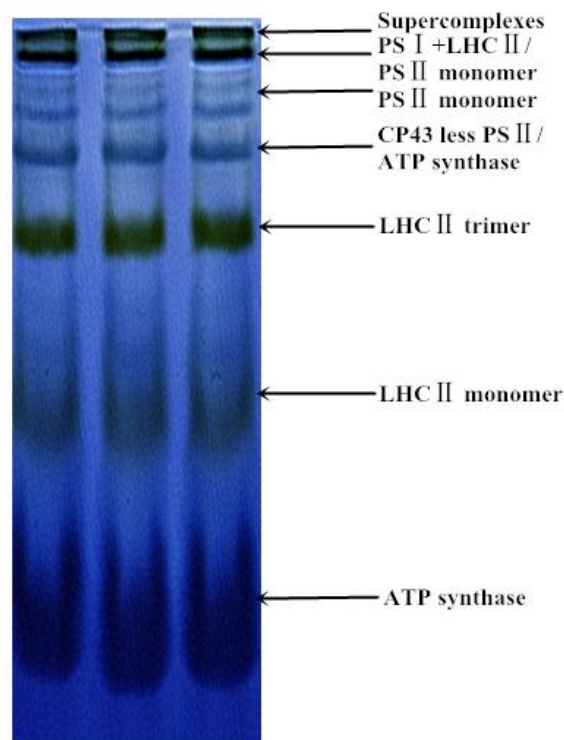

**Fig.11** Membrane protein complexes in wucai seedlings. Blue-native gel electrophoresis of membrane complexes protein from stroma thylakoids were solubilised by n-dodecylmaltoside. Protein complexes were first solubilized from thylakoid membranes using n-dodecyl- $\beta$ -D-



maltoside (DM) and then separated by BN-PAGE. After the first dimensional separation, seven major protein complexes were obtained.

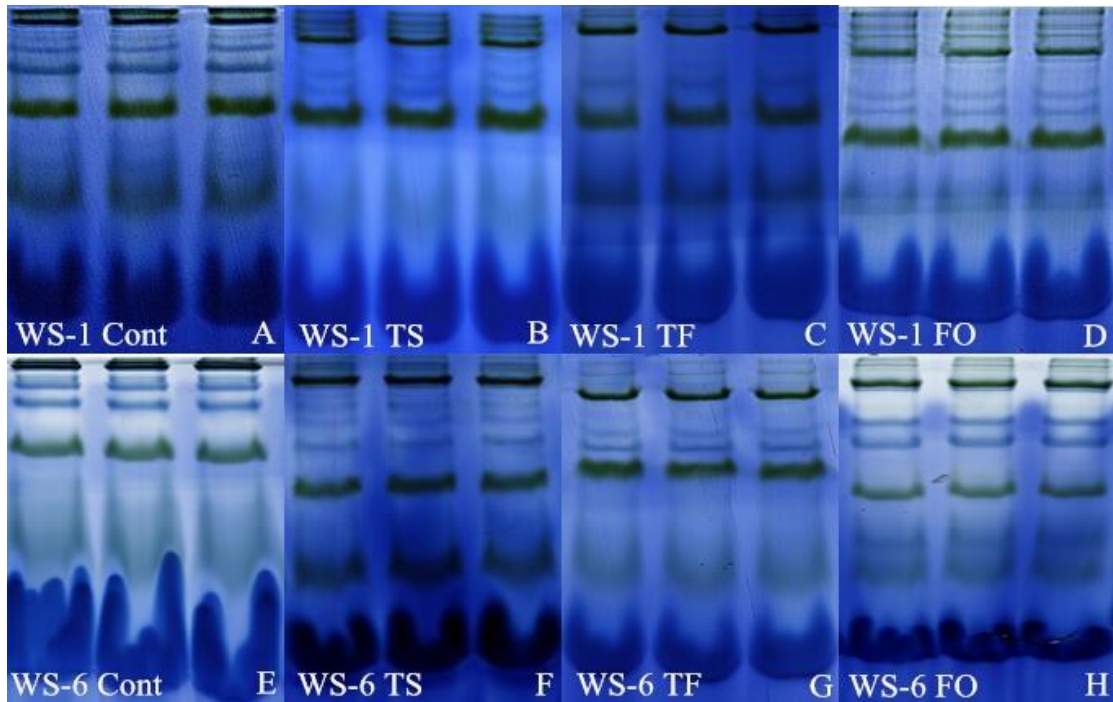

**Fig.12** Effects of heat stress on membrane protein complexes in wucaï seedlings. *Cont* 20 °C/12 °C (d/n) treatment for 3 days, *TS* 27 °C/18 °C (d/n) stress treatment for 3 days, *TF* 34 °C/24 °C(d/n) stress treatment for 3 days, *FO* 41 °C/30 °C (d/n) stress treatment for 3 days

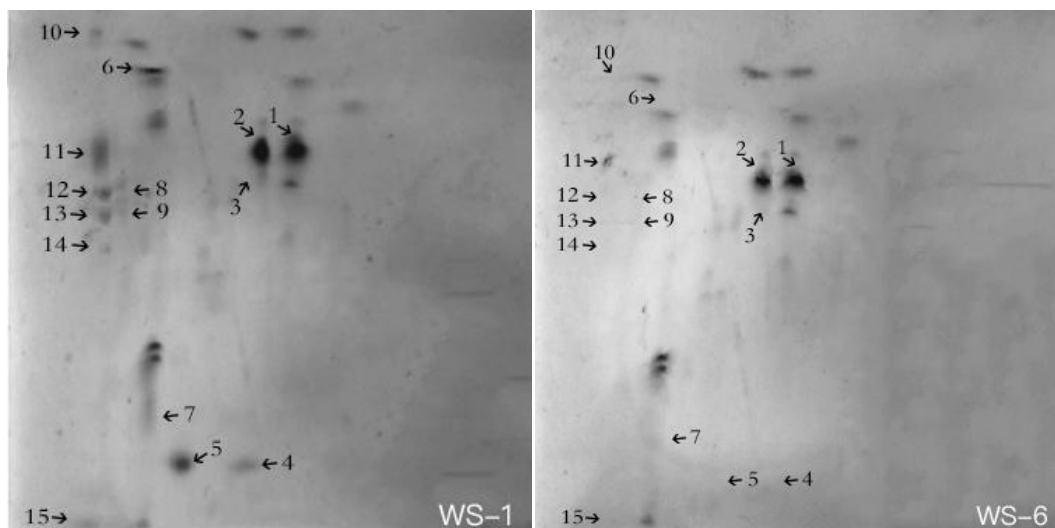

**Fig.13** Effects of heat stress on differential membrane proteins in wucaï seedlings.

41 °C/30 °C (d/n) stress treatment for 3 days

**Table 1** Effects of heat stress on fresh weight, dry weight, plant height, stem diameter, leaf width and leaf length in wucaï plants

| Controls | Fresh weight | Dry weight   | Plant height | Stem diameter | Leaf width  | Leaf length |             |
|----------|--------------|--------------|--------------|---------------|-------------|-------------|-------------|
| WS-1     | Cont         | 30.80±0.149a | 2.92±0.038a  | 10.27±0.25c   | 3.68±0.011a | 4.83±0.15a  | 6.24±0.11a  |
|          | TS           | 30.76±0.118a | 2.91±0.026a  | 10.32±0.16c   | 3.65±0.012a | 4.84±0.15a  | 6.26±0.14a  |
|          | TF           | 29.97±0.092b | 2.76±0.026b  | 10.87±0.20b   | 3.56±0.023b | 4.74±0.13a  | 6.13±0.15ab |
|          | FO           | 27.85±0.141c | 2.55±0.029c  | 11.32±0.16a   | 3.39±0.024c | 4.55±0.19b  | 6.02±0.25b  |
| WS-6     | Cont         | 28.67±0.146a | 2.71±0.028a  | 10.46±0.17c   | 3.16±0.022a | 4.46±0.17b  | 7.46±0.13a  |
|          | TS           | 28.63±0.118a | 2.69±0.023a  | 10.48±0.14c   | 3.13±0.037a | 4.48±0.18a  | 7.48±0.07a  |
|          | TF           | 27.07±0.081b | 2.50±0.031b  | 11.32±0.21b   | 2.89±0.062b | 4.32±0.17c  | 7.24±0.12b  |
|          | FO           | 24.05±0.081c | 2.26±0.024c  | 12.30±0.19a   | 2.50±0.048c | 4.05±0.18d  | 6.95±0.14c  |

Values represent the mean ± SE (n=3). Letters indicate significant differences at P<0.05 according to Duncan's multiple range tests. *Cont* 20 °C/12 °C (d/n) treatment for 3 days], *TS* 27 °C/18 °C (d/n) stress treatment for 3 days, *TF* 34 °C/24 °C(d/n) stress treatment for 3 days, *FO* 41 °C/30 °C (d/n) stress treatment for 3 days

**Table 2** Effects of heat stress on the fatty acid composition of thylakoid membranes in two wucaï cultivars

| Fatty acid Composition<br>(mol %) | Treatments     |                |                |                |                |                |
|-----------------------------------|----------------|----------------|----------------|----------------|----------------|----------------|
|                                   | WS-1 Cont      | WS-1 HT        | WS-1 Recovery  | WS-6 Cont      | WS-6 HT        | WS-6 Recovery  |
| Palmitic acid(16:0)               | 23.042±0.469b  | 35.795±0.715a  | 24.154±0.715b  | 23.873±0.390c  | 29.315±0.774a  | 27.653±0.708b  |
| Stearic acid(18:0)                | 9.221±0.316c   | 15.235±0.763a  | 10.362±0.434b  | 10.353±0.362c  | 13.662±0.639a  | 12.878±0.781b  |
| Palmitoleic acid(16:1)            | 10.124±0.364a  | 8.963±0.513c   | 9.584±0.614b   | 9.910±0.548a   | 9.770±0.770a   | 9.224±0.595b   |
| Oleic acid(18:1)                  | 12.381±0.443a  | 8.665±0.399b   | 12.450±0.681a  | 11.211±0.381a  | 10.673±0.579b  | 10.263±0.672b  |
| Linoleic acid(18:2)               | 11.222±0.349a  | 9.131±0.595b   | 10.981±0.616a  | 10.432±0.330a  | 10.086±0.469b  | 10.211±0.501ab |
| Linolenic acid(18:3)              | 34.021±0.671a  | 22.231±0.723c  | 32.482±0.640b  | 34.222±0.531a  | 26.522±0.652c  | 29.781±0.663b  |
| UFA                               | 67.748±1.729a  | 48.990±1.980c  | 65.497±2.150b  | 65.785±1.585a  | 57.051±2.081c  | 59.479±2.072b  |
| SFA                               | 32.264±0.508c  | 51.030±1.409a  | 34.516±1.105b  | 34.226±0.583c  | 42.977±1.096a  | 40.532±1.358b  |
| UFA/SFA                           | 2.100±0.062a   | 0.960±0.012c   | 1.898±0.026b   | 1.922±0.140a   | 1.327±0.019c   | 1.467±0.004b   |
| IUFA                              | 147.012±3.263a | 102.582±3.882c | 141.443±4.169b | 144.661±2.806a | 120.181±3.671c | 129.251±3.626b |

Values represent the mean ± SE (n=3). Letters indicate significant differences at P<0.05 according to Duncan's multiple range tests. *Cont* 20 °C/12 °C (d/n) treatment for 3 days, *HT* 41 °C/30 °C (d/n) stress treatment for 3 days, *Recovery* after *HT* treatment, transferred to 20 °C/12 °C (d/n) treatment for 3 days

**Table 3** Derivations and definitions of JIP parameters directly obtained from the recorded

OJIP fluorescence transients

| Technical fluorescence parameters | Definition                                                            |
|-----------------------------------|-----------------------------------------------------------------------|
| $F_0$                             | Fluorescence value at 50 ms, used as initial value of fluorescence    |
| $F_V/F_M$                         | Maximum quantum yield of primary PSII photochemistry                  |
| $ABS/RC$                          | Average absorbed photon flux per PSII reaction centre                 |
| $TR_O/RC$                         | Maximum trapped exciton flux per PSII reaction centre                 |
| $DI_O/RC$                         | Dissipated energy flux per PSII reaction centre                       |
| $ET_O/RC$                         | Electron transport flux from $Q_A$ to $Q_B$ per PSII reaction centre  |
| $RC/CS_M$                         | Number of active reaction centres per cross section of PSII           |
| $ABS/CS_M$                        | Average absorbed photon flux per cross section of PSII                |
| $TR_O/CS_M$                       | Maximum trapped exciton flux per cross section of PSII                |
| $DI_O/CS_M$                       | Dissipated energy flux per cross section of PSII                      |
| $ET_O/CS_M$                       | Electron transport flux from $Q_A$ to $Q_B$ per cross section of PSII |
| $PI_{ABS}$                        | Performance index on absorption basis                                 |

**Table 4** Differentially synthesised proteins identified by MALDI-TOF-MS and LC-ESI-MS/MS from the spots in BN/SDS-PAGE in Fig.13.

| Spots | Protein name                                                 | Source                                | Accession No                       |
|-------|--------------------------------------------------------------|---------------------------------------|------------------------------------|
| 1     | Photosystem II CP43 reaction center protein OS               | Brassica oleracea var. capitata       | tr A0A0H3XZM8 A0A0H3XZM8_B<br>RAOC |
| 2     | ATP synthase subunit alpha OS                                | Brassica napus                        | tr A0A078G6X6 A0A078G6X6_BR<br>ANA |
| 3     | BnaC03g29960D protein OS                                     | Brassica napus                        | tr A0A078DQX4 A0A078DQX4_BR<br>ANA |
| 4     | Chlorophyll a-b binding protein, chloroplastic (Fragment) OS | Sinapis alba                          | tr A0A075C5B7 A0A075C5B7_SIN<br>AL |
| 5     | Photosystem II D2 protein OS                                 | Brassica oleracea var. oleracea       | tr A0A0D3BE55 A0A0D3BE55_BR<br>AOL |
| 6     | Photosystem II OS                                            | Brassica oleracea var. capitata       | tr A0A0H3XZM8 A0A0H3XZM8_B<br>RAOC |
| 7     | Chlorophyll a-b binding protein, chloroplastic (Fragment) OS | Sinapis alba                          | tr A0A075C5B7 A0A075C5B7_SIN<br>AL |
| 8     | Photosystem I P700 chlorophyll a apoprotein A2 OS            | Brassica oleracea var. capitata       | tr A0A0H3Y227 A0A0H3Y227_BR<br>AOC |
| 9     | Chlorophyll a-b binding protein, chloroplastic (Fragment)    | Brassica napus                        | tr A0A075C5B7 A0A075C5B7_SIN<br>AL |
| 10    | Chlorophyll a-b binding protein, chloroplastic OS            | Brassica oleracea var. oleracea       | tr A0A0D3AHD4 A0A0D3AHD4_B<br>RAOL |
| 11    | ATP synthase subunit beta, chloroplastic OS                  | Raphanus sativus var. raphanistroides | tr A0A249RSF6 A0A249RSF6_RAP<br>SA |
| 12    | Chlorophyll a-b binding protein, chloroplastic OS            | Brassica napus                        | tr A0A078J8I6 A0A078J8I6_BRAN<br>A |
| 13    | Chlorophyll a-b binding protein, chloroplastic (Fragment) OS | Sinapis alba                          | tr A0A075C5B7 A0A075C5B7_SIN<br>AL |
| 14    | Chlorophyll a-b binding protein, chloroplastic OS            | Brassica napus                        | tr A0A078FKQ7 A0A078FKQ7_BR<br>ANA |
| 15    | Chlorophyll a-b binding protein, chloroplastic OS            | Brassica oleracea var. oleracea       | tr A0A0D3AHD4 A0A0D3AHD4_B<br>RAOL |
